# Supplementary material for: Topological Small-World Organization of the Fibroblastic Reticular Cell Network Determines Lymph Node Functionality
Source: PLoS Biol. 2016 Jul 14;14(7):e1002515. doi: 10.1371/journal.pbio.1002515 (PMC4945005; doi:10.1371/journal.pbio.1002515)
Supplement: S1 Data — (XLS) [file pbio.1002515.s001.xls]

## Sheet: 2B
d0	d14	d28	ctrl			d0	d14	d28	ctrl
0.488538	30.6192	150.596	133.84		Mean	1.052	41.49	142.5	128.2
1.78343	51.268	159.448	124.224		SD	0.6638	10.37	12.37	5.013
0.882542	42.5729	135.524	126.573
		128.491
		138.656			1-way ANOVA
					Tukey's Multiple Comparison Test	Mean Diff.	q	Significant? P < 0.05?	Summary	95% CI of diff
					d0 vs d14	-40.44	7.472	Yes	**	-63.85 to -17.02
					d0 vs d28	-141.5	29.23	Yes	***	-162.4 to -120.5
					d0 vs ctrl	-127.2	23.5	Yes	***	-150.6 to -103.7
					d14 vs d28	-101.1	20.88	Yes	***	-122.0 to -80.11
					d14 vs ctrl	-86.73	16.03	Yes	***	-110.1 to -63.31
					d28 vs ctrl	14.33	2.961	No	ns	-6.613 to 35.27

## Sheet: 2C
d14	d28	ctrl			d14	d28	ctrl
989.79	726.701	330.96		Mean	846.3	692.6	633.5
596.25	428.824	929.39		SD	327.3	248.4	211.1
656.54	594.269	737.63
484.8	408.775	549.01
944.83	465.6	585.71		1-way ANOVA
940.1	715.126	376.46		Tukey's Multiple Comparison Test	Mean Diff.	q	Significant? P < 0.05?	Summary	95% CI of diff
663.25	312.769	557.82		d14 vs d28	153.7	9.036	Yes	***	96.91 to 210.6
648.2	564.591	684.96		d14 vs ctrl	212.8	12.09	Yes	***	154.0 to 271.7
617.59	332.514	421.81		d28 vs ctrl	59.08	5.438	Yes	***	22.79 to 95.38
251.35	279.019	440.49
864.03	558.069	883.81
611.16	681.212	830.86
1095.13	452.868	687.83
592.14	481.941	347.27
677.12	315.243	770.76
815.34	340.388	441.09
591.36	494.169	674.72
1114.51	458.039	862.42
789.17	631.75	627.67
514.55	604.64	502.09
1168.42	663.717	696.69
620.44	390.398	694.33
1112.27	553.633	964.61
1725.38	511.793	876.48
1807.89	290.84	533.99
853.26	511.771	775.53
1090.87	679.83	308.73
592.1	529.024	393.31
839.5	348.875	618.03
606.83	590.373	681.64
829.02	567.39	859.03
1227.39	334.546	564.38
800.18	631.188	1170.01
1342.69	503.601	899.93
1869.11	716.499	492.12
1050.61	335.479	757.12
609.74	701.708	564.1
615.03	327.838	736.77
667.46	426.898	476.19
597.3	402.501	745.93
547.58	915.897	1032.04
765.22	685.748	716.11
1084.03	576.313	974.13
802.52	621.906	699.14
897.2	611.559	381.49
906.83	670.835	564.8
451.19	854.525	702.84
535.83	777.565	601.45
710.07	827.335	423.05
791.04	550.867	609.72
816.56	626.15	526.87
615.54	563.419	559.31
970.62	790.107	666.72
710.72	698.631	624.94
1433.5	1284.21	559.85
1162.08	578.652	548.19
534.08	340.118	786.88
610.71	589.202	704.88
510.27	530.459	467.1
685.44	453.707	450.44
652.13	521.563	464.75
682.66	788.528	353.81
602.36	475.686	512.79
911.21	339.992	638.98
841.42	763.104	345.63
360.77	721.887	377.55
864.09	584.893	342.16
803.5	735.984	1121.89
495.45	727.564	532.82
647.04	974.611	511.04
574.91	1075.62	313.27
1022.77	767.824	831.53
399.25	408.07	493.72
771.99	500.02	526.84
980.79	1015.41	629.58
827.13	555.188	777.1
904.7	598.853	660.38
650.72	451.726	722.57
549.33	709.019	678.54
587.96	1230.61	568.1
620.25	821.089	355.04
1325.64	337.103	904.83
1072.87	1292.57	653.16
812.27	534.972	440.29
1263.99	687.52	836.37
1356.93	492.418	1324.33
606.81	565.94	601.01
1553.92	374.434	807.38
1202	842.031	581.78
406.72	518.521	928.94
1163.14	548.377	443.68
942.5	577.999	434.68
785.53	568.092	737.56
1039.57	719.966	824.93
786.47	1042.3	446.58
1597.73	518.474	1128.79
880.76	438.239	549.72
1163.67	446.684	996.87
620.78	702.271	1206.57
999.87	1091.59	479.91
1203.78	707.433	619.24
837.14	848.718	604.81
1004.56	354.283	1184.57
426.57	246.623	543.45
578.44	639.247	653.76
939.65	483.845	788.52
661.77	542.881	793.27
356.92	636.062	890.3
544.04	376.586	1198.99
363.51	532.797	522.63
1361.49	661.886	927.39
966.08	818.256	588.9
1252.04	767.01	855.14
926.87	316.249	839.95
686.91	376.068	717.95
563.36	805.328	349.92
932.46	822.214	668.88
596.28	578.408	541.42
966.29	827.514	363.54
686.67	430.052	1340.57
1097.94	746.382	338.51
1323.44	713.638	1197.74
722.99	437.568	477.36
1982.25	420.173	643.87
450.86	555.217	318.88
	552.321	707.58
	609.781	544.33
	867.193	539.99
	574.227	630.34
	549.93	722.43
	637.125	401.21
	771.978	671.56
	897.384	497.36
	1180.58	878.24
	588.462	518.9
	574.58	878.84
	617.102	1021.09
	402.237	882.6
	722.316	708.32
	716.37	710.86
	634.562	866.87
	554.068	1030.49
	1306.67	788.34
	609.487	888.72
	753.752	870.34
	475.772	504.91
	827.011	896.64
	309.68	897.89
	792.499	842.87
	702.206	978.63
	309.127	1252.53
	378.162	1334.86
	639.263	715.41
	722.065	670.93
	753.658	417.22
	1046.33	556.02
	795.203	428.48
	801.296	635.28
	424.134	432.01
	507.06	669.05
	300.471	373.22
	599.953	574.09
	1172.79	455.54
	521.363	565.05
	1166.77	570.43
	593.667	809.5
	421.708	559.81
	633.482	624.48
	518.158	340.93
	877.484	354.05
	1236.29	377.53
	1120.04	527.82
	452.906	450.31
	984.872	497.94
	310.453	449.43
	459.11	1142.35
	616.038	1078.62
	416.998	643.48
	436.748	645.34
	325.335	697.15
	360.331	1267.24
	353.397	651.47
	663.219	582.78
	839.018	468.87
	940.449	755.83
	769.4	662.94
	321.064	679.34
	364.693	814.43
	539.785	438.32
	661.054	782.33
	623.37	541.18
	663.965	952.36
	868.127	1035.05
	811.643	712.09
	864.07	694.47
	972.141	545.81
	800.077	659.22
	527.386	807.27
	1149.63	724.31
	467.184	557.16
	477.586	861.96
	887.11	578.31
	386.252	433.61
	599.505	328.9
	755.896	391.25
	597.877	837.59
	522.498	558.22
	660.23	1241.63
	829.281	690.63
	839.74	489.23
	450.545	450.79
	759.12	611.83
	490.755	544.33
	640.52	740.09
	480.707	858.82
	873.89	701.46
	484.207	622.88
	419.8	467.7
	324.86	510.04
	926.498	641.1
	283.729	291.2
	382.959	646.96
	589.328	839.96
	567.347	925.4
	336.81	982.75
	483.501	859.13
	594.167	839.74
	518.349	451.8
	1034.76	480.36
	792.159	849.4
	706.346	484.71
	492.223	813.87
	908.139	425.38
	577.908	298.63
	802.979	438.15
	681.709	765.41
	1045.16	536.11
	465.898	537.19
	665.193	599.67
	543.138	513.6
	443.288	766.69
	755.234	1081.15
	999.547	613.2
	455.909	457.16
	958.248	528.52
	631.681	718.85
	671.589	474.35
	907.28	285.73
	392.836	272.52
	950.17	434.79
	543.561	275.37
	1182.45	640.48
	490.316	693.43
	704.074	279.29
	740.536	541.9
	942.597	368.95
	1129.8	742.32
	546.604	626.77
	826.591	610.02
	919.201	741.19
	475.792	440.79
	1188.66	479.73
	1354.79	834.95
	566.81	475.15
	621.197	613.37
	462.919	1153.66
	676.489	512.98
	594.294	588.5
	936.486	656.83
	515.193	439.53
	459.324	934.7
	431.132	889.56
	425.209	450.9
	432.58	715.51
	516.085	529.7
	462.63	746.46
	811.217	359.29
	395.497	323.96
	758.369	872.64
	805.295	834.97
	505.634	646.4
	624.432	745.1
	805.507	500.07
	342.104	645.01
	461.289	489.09
	448.805	774.55
	1036.82	606.08
	1236.9	646.31
	478.715	1234.01
	680.045	439.01
	396.248	544.13
	650.588	435.48
	640.968	1049.6
	516.523	717.52
	804.988	448.76
	1001.28	1102.06
	342.999	357.76
	387.032	502.33
	808.606	316.52
	442.155	350.465
	541.377	806.934
	412.893	801.468
	851.134	858.082
	582.905	517.636
	632.027	302.826
	596.142	551.992
	435.187	602.586
	883.686	740.977
	355.368	663.721
	747.994	727.912
	279.781	314.903
	861.065	721.776
	386.787	623.602
	480.927	799.948
	712.313	736.556
	601.067	643.54
	599.272	1028.94
	918.305	697.626
	482.119	598.852
	398.67	664.688
	548.869	616.25
	588.782	418.321
	309.433	663.589
	642.261	697.737
	430.099	725.151
	342.824	506.754
	406.381	777.879
	517.522	636.137
	487.233	645.798
	571.102	508.674
	544.267	602.815
	640.576	602.166
	391.421	692.917
	584.325	638.275
	383.391	564.09
	350.724	692.53
	356.588	557.564
	1212.79	506.732
	724.338	297.556
	547.505	467.783
	400.151	451.421
	750.899	636.657
	425.319	606.475
	873.266	588.955
	637.05	577.539
	419.841	412.631
	845.333	418.437
	414.157	357.387
	576.325	777.057
	710.355	557.719
	621.475	539.323
	591.277	615.274
	617.281	574.829
	557.679	797.835
	426.799	328.361
	601.521	311.07
	257.384	455.788
	697.794	427.611
	431.312	704.738
	1405.99	783.348
	580.583	393.6
	610.713	734.323
	761.838	1022.31
	869.982	734.823
	827.257	721.569
	612.788	474.51
	541.816	355.74
	864.256	549.676
	779.19	543.736
	1148.89	418.873
	764.293	352.599
	804.173	686.59
	851.658	506.066
	657.739	385.332
	1184.55	605.214
	757.664	327.103
	523.674	489.283
	518.232	645.605
	618.117	423.665
	959.84	654.238
	738.164	740.077
	716.791	730.267
	1073.07	630.978
	991.625	430.545
	586.543	601.201
	918.879	404.604
	422.011	578.611
	382.69	584.068
	857.241	582.244
	1101.73	811.926
	837.053	290.915
	789.711	469.896
	655.191	398.457
	452.924	480.231
	1083.58	524.666
	606.722	1099.68
	635.299	571.731
	790.772	533.931
	1051.46	703.387
	483.815	522.628
	1116.86	589.719
	510.329	565.135
	333.332	455.501
	616.71	448.907
	608.167	626.008
	382.233	505.218
	761.101	505.802
	542.968	1045.55
	367.454	518.177
	396.371	484.219
	719.244	817.794
	1114.36	434.8
	1055.53	384.468
	584.196	800.023
	329.274	352.455
	447.236	529.698
	337.167	769.364
	1140.6	558.566
	668.119	684.315
	675.782	534.216
	1193.97	448.726
	809.356	411.607
	465.484	393.376
	771.916	704.45
	630.873	589.41
	1013.4	703.577
	767.689	732.516
	718.291	448.665
	1044.49	516.312
	800.587	461.766
	989.725	509.911
	1193.53	591.889
	679.914	529.495
	853.338	952.803
	867.017
	843.593
	863.262
	446.597
	728.941
	832.729
	430.892
	1007.46
	1153.9
	483.308
	809.537
	1014.18
	1234.18
	456.051
	709.851
	975.271
	1087.29
	839.873
	1159.9
	1241.12
	862.892
	970.189
	1028.48
	745.848
	630.012
	740.266
	1195.88
	780.508
	671.841
	765.608
	895
	1126.33
	371.953
	979.169
	1153.06
	1515.99
	545.184
	1168.74
	475.198
	471.952
	368.762
	1003.79
	1018.05
	648.984
	690.226
	892.463
	959.994
	546.139
	478.735
	1070.74
	433.985
	367.866
	1189.31
	705.621
	822.974
	790.103
	948.108
	967.215
	586.965
	728.939
	887.082
	932.565
	999.804
	896.782
	902.031
	726.304
	357.351
	376.371
	608.94
	701.036
	420.21
	513.417
	998.316
	1132.05
	702.846
	688.432
	705.057
	1127.24
	1098.06
	647.044
	492.881
	440.403
	1155.43
	501.922
	701.693
	584.089
	532.821
	993.904
	630.094
	598.234
	757.655
	546.761
	402.355
	1003.13
	559.492
	610.088
	579.481
	339.819
	367.641
	1108.25
	826.655
	597.557
	966.129
	385.132
	864.176
	970.067
	446.211
	541.494
	939.924
	706.139
	1013.28
	584.712
	494.635
	671.719
	679.741
	1232.35
	1025.77
	1050.45
	677.023
	702.715
	948.684
	1308.72
	835.081
	502.923
	963.662
	998.571
	724.576
	1078.66
	584.437
	728.747
	1078.6
	899.686
	831.716
	1010.28
	613.728
	882.085
	1091.69
	546.363
	1088.22
	1178.42
	728.198
	1021.89
	548.792
	630.375
	657.391
	412.942
	721.47
	661.495
	775.233
	1119.81
	566.77
	1029.67
	861.685
	508.485
	826.437
	759.596
	666.616
	1009.14
	1016.47
	1011.32
	620.273
	854.326
	1131.45
	1165.93
	612.623
	720.389
	548.66
	1090.13
	842.594
	678.357
	1370.29
	946.773
	1019.63
	1303.68
	632.898
	838.653
	429.552
	1169.61
	401.158
	635.96
	728.332
	914.475
	809.303
	1230.67

## Sheet: 2D
d14	d28	ctrl			d14	d28	ctrl
903.33	678.362	317.24		Mean	738	608.9	533.9
559.3	396.07	788.36		SD	312.2	226.6	173.1
470.79	444.993	625.23
404.32	279.399	532.43
715.3	433.986	519.5		1-way ANOVA
821.45	462.721	313.74		Tukey's Multiple Comparison Test	Mean Diff.	q	Significant? P < 0.05?	Summary	95% CI of diff
397.94	252.015	437.63		d14 vs d28	129.2	8.473	Yes	***	78.25 to 180.1
539.31	297.991	542.28		d14 vs ctrl	204.1	12.94	Yes	***	151.4 to 256.8
463.97	251.652	365.86		d28 vs ctrl	74.95	7.698	Yes	***	42.42 to 107.5
182.62	220.326	405.98
881.32	387.192	813.76
578.96	441.913	765.79
986.1	329.55	673.48
366.98	345.164	330.5
654.25	246.379	690.05
540.42	269.032	437.07
567.75	375.846	610.88
971.58	335.369	675.17
724.42	665.993	446.04
519.33	573.7	542.74
1052	604.337	579.97
499.7	340.732	561.66
838.85	325.955	788.91
1480.16	413.096	652.39
1809.7	265.408	430.28
811.76	397.017	645.05
959.01	657.572	336.89
586.36	422.104	308.09
734.4	365.262	471.68
490.85	465.479	672.83
570.14	487.935	716.85
978.63	284.158	481.57
544.09	497.526	966.74
1195.08	360.338	815.26
1711.33	708.313	470.96
875.95	308.136	530.43
477.85	566.572	470.07
641.52	255.267	599.8
429.55	373.287	422.94
615.79	344.228	641.03
491.03	674.052	834.97
577.05	540.352	580.68
935.38	478.285	768.72
636.01	547.287	520.49
703.14	516.925	304.08
877.75	581.607	432.14
369.17	629.387	564.02
541.98	608	387.05
680.43	683.953	380.21
756.76	355.595	514.21
837.91	456.424	375.04
622.95	350.249	500.57
921.94	578.34	500.77
493.59	572.476	479.11
1338.14	1043.34	500.27
771.93	447.193	383.5
409.3	271.54	702.72
604.41	499.445	672.17
390.9	404.874	349.88
824.76	322.489	354.71
708.15	471.583	406.67
677.76	641.791	358.52
791.21	374.357	433.33
671.65	266.325	482.12
767.15	626.257	366.14
286.1	536.669	304.38
525.53	452.247	314.52
671.38	616.397	911.32
439.61	527.967	390.01
477.3	682.838	394.09
459.07	809.044	235.78
767.75	607.528	697.72
389.08	396.843	461.01
637.04	307.904	414.24
745.73	791.681	608.31
676.44	475.343	757.84
741.85	724.396	626.32
532.72	399.844	628.85
690.51	562.545	597.21
586.41	804.483	582.35
446.36	695.534	416.01
1193.86	244.982	676.81
854.52	1044.45	463.76
587.63	456.201	466.95
1452.54	536.5	729.15
962.6	469.773	1158.4
528.38	450.5	554.52
1661.5	275.045	775.27
958.14	775.435	432.62
284.46	379.829	726.59
830.36	402.046	444.34
587.58	528.537	387.68
598.31	474.785	634.32
863.95	535.162	698.2
672.69	1036.24	377.22
1419.06	477.197	931.24
883.36	482.914	427.38
1265.93	419.849	845.99
477.86	709.7	820.29
682.24	974.737	467.02
906.96	510.577	424.95
778.79	731.912	560.01
846.58	212.84	958.66
388.22	226.562	414.36
567.18	505.106	464.39
942.98	384.733	678.7
662.63	432.337	634.29
363.1	522.26	831.85
499.84	341.456	1032.57
379.62	440.496	426.73
1403.6	573.227	927.42
686.55	769.07	436.08
1101.51	645.047	663.08
788.13	226.606	663.47
632.63	270.092	594.44
603.19	630.316	321.5
877.36	727.483	614.24
615.94	493.27	411.63
924.84	496.264	330.97
566.46	281.421	1087.88
1291	602.627	360.97
1128.16	536.077	1138.42
541.22	373.466	519.44
1606.21	307.603	603.33
360.1	487.486	326.93
	508.911	581.84
	451.873	439.6
	756.497	468.82
	483.885	528.14
	461.902	561.21
	579.116	384.36
	647.008	699.68
	587.846	418.09
	962.379	708.67
	442.367	397.9
	411.422	748.09
	461.841	1028.62
	275.359	840.34
	531.526	619.51
	590.268	536.94
	636.442	788.59
	450.842	897.63
	992.603	724.48
	478.425	688.72
	504.992	769.36
	460.178	439.05
	608.748	707.69
	237.33	781.63
	664.041	775.13
	630.655	685.16
	281.239	993.53
	324.221	1147.05
	560.492	654.03
	608.112	494.31
	678.497	365.19
	887.071	467.49
	649.49	391.52
	644.81	543.41
	325.679	363.31
	529.337	607.72
	251.164	318.8
	596.467	442.16
	1160.01	396.3
	506.079	386.88
	1178.21	562.48
	555.127	620.75
	418.576	413.49
	570.513	519.85
	390.38	280.54
	747.125	328.15
	983.797	362.35
	885.545	517.21
	411.037	391.39
	971.404	423.61
	289.576	385.96
	409.675	819.28
	460.926	937.4
	426.088	479.6
	432.515	487.63
	289.349	652.64
	334.176	936.22
	338.314	711.01
	585.725	515.59
	736.656	434.87
	845.721	590.22
	672.844	580.44
	343.971	627.26
	351.348	726.96
	479.016	411.83
	531.083	678.33
	655.106	437.86
	504.709	762.68
	932.014	805.81
	621.285	541.08
	780.344	555.55
	839.877	371.22
	640.052	528.08
	422.361	587.99
	1124.18	543.56
	413.44	556.93
	444.317	592.14
	698.515	456.33
	346.623	349.59
	701.277	327.3
	775.329	321.94
	480.376	731.95
	491.981	394.14
	625.147	1054.55
	771.36	513.63
	803.584	433.94
	381.52	390.75
	648.742	575.11
	506.142	537.4
	537.166	559.62
	409.523	693.31
	687.629	595.59
	468.716	509.11
	364.168	488.3
	324.141	427.56
	745.709	620.02
	227.053	259.81
	293.709	500.12
	515.995	616.01
	379.498	836.69
	254.332	839.75
	388.607	712.01
	481.851	654.03
	403.669	325.95
	762.183	475.42
	656.443	728.42
	718.477	328.8
	546.943	712.56
	872.971	418.02
	514.353	281.07
	740.361	451.77
	594.266	643.75
	889.803	606.8
	454.737	518.7
	588.67	571.04
	527.42	420.89
	355.826	721.82
	575.085	1138.82
	773.112	485.8
	306.37	311.64
	806.193	430.45
	589.401	622.18
	554.971	402.24
	666.842	248.29
	359.655	217.31
	746.096	349.24
	424.736	242.19
	981.837	467.96
	384.124	590.93
	614.328	257.27
	792.985	429.12
	741.397	301.95
	787.612	629.7
	524.094	583.34
	858.941	587.96
	785.123	534.29
	437.922	476.88
	1074.2	378.84
	1046.54	623.26
	475.748	498.05
	659.813	584.45
	456.176	898.71
	587.436	497.26
	503.843	526.78
	862.909	517.27
	423.392	473.02
	443.48	697.09
	391.592	724.07
	367.303	565.91
	371.278	625.81
	457.429	485.64
	410.815	555.51
	734.111	377.82
	353.458	318.53
	498.221	752.73
	859.507	623.89
	480.419	537.82
	509.647	627.85
	610.997	419.43
	297.783	535.12
	435.289	368.83
	395.41	706.64
	953.704	529.29
	1034.02	497.42
	409.314	996.66
	632.449	415.76
	372.931	438.33
	585.176	322.9
	662.868	804.02
	473.489	630.47
	643.367	404.41
	772.85	874.14
	384.548	298.69
	356.786	397.82
	721.416	294.61
	439.193	320.357
	500.13	636.439
	326.617	551.577
	851.637	566.396
	535.784	407.245
	619.977	259.934
	531.068	431.569
	454.002	462.888
	825.032	580.054
	331.623	498.01
	675.353	616.362
	185.134	293.414
	675.827	545.239
	335.839	665.305
	404.861	617.611
	510.376	610.565
	522.672	533.365
	498.822	813.733
	994.468	536.455
	388.76	494.091
	369.855	576.559
	503.43	570.32
	524.384	344.644
	290.221	482.834
	541.704	562.22
	378.271	624.027
	310.465	441.586
	330.498	630.065
	385.65	454.527
	400.854	544.417
	571.886	460.694
	361.233	449.56
	652.481	499.044
	344.609	566.621
	592.397	538.98
	395.746	413.322
	325.513	522.556
	283.009	446.896
	958.152	443.197
	698.762	229.986
	643.03	439.933
	312.352	462.116
	741.692	528.029
	459.683	456.033
	570.295	503.047
	560.234	506.38
	403.902	404.684
	820.442	397.373
	385.047	287.371
	577.94	628.942
	576.05	500.276
	592.381	407.527
	596.657	448.836
	474.762	508.93
	524.617	602.854
	413.635	288.891
	395.502	334.067
	210.38	311.918
	631.633	409.249
	316.047	508.811
	1110.47	634.391
	483.762	287.987
	457.286	672.135
	618.259	822.931
	726.787	547.745
	626.083	551.094
	474.032	397.638
	511.958	269.328
	642.743	476.568
	633.938	447.164
	854.927	400.058
	676.849	404.636
	630.093	581.248
	662.468	456.291
	603.27	452.263
	962.233	554.83
	799.268	302.348
	494.272	450.364
	421.343	607.975
	526.365	406.923
	885.019	598.354
	624.841	609.528
	571.196	609.752
	957.036	569.636
	835.357	380.924
	552.746	548.865
	870.097	367.611
	436.845	448.447
	326.853	514.223
	717.889	473.941
	996.68	848.04
	708.207	295.098
	772.896	361.799
	681.597	389.53
	454.414	448.452
	871.437	327.397
	562.379	881.801
	609.742	405.305
	687.144	351.394
	1014.9	555.869
	473.98	357.254
	1045.15	487.759
	641.626	349.511
	333.3	390.842
	557.471	491.805
	520.518	526.15
	405.08	442.806
	688.612	445.087
	611.086	769.173
	379.856	353.691
	488.759	448.493
	730.205	591.886
	961.886	343.908
	1115.62	331.332
	597.138	576.682
	372.659	401.814
	455.031	381.027
	375.672	632.562
	1058.38	497.247
	594.857	530.024
	545.061	455.655
	1035.34	302.636
	806.019	414.712
	466.767	353.682
	804.203	470.916
	641.064	513.821
	1010.25	536.991
	671.977	519.908
	671.468	366.337
	887.24	504.854
	764.657	342.962
	974.123	432.575
	999.419	550.43
	494.778	486.211
	980.052	687.762
	911.437
	875.039
	773.437
	559.574
	565.302
	848.027
	431.561
	916.96
	1193.33
	324.998
	791.721
	882.794
	950.129
	428.465
	568.449
	926.37
	824.927
	865.707
	1004.51
	987.179
	807.582
	865.641
	1266.37
	610.575
	569.934
	832.16
	1259.63
	857.644
	708.473
	717.427
	880.713
	1035.22
	365.57
	889.076
	961.313
	1199.95
	588.14
	997.964
	390.381
	483.506
	362.78
	758.021
	834.997
	686.478
	699.901
	863.624
	1014.73
	465.59
	405.494
	1081.9
	380.453
	346.364
	1125.06
	722.627
	686.329
	658.806
	1003.06
	774.682
	604.33
	606.527
	865.049
	994.328
	906.219
	817.137
	843.242
	591.474
	358.794
	327.231
	599.914
	666.57
	429.86
	407.398
	799.326
	1128.14
	666.082
	622.337
	661.297
	1051.97
	996.483
	618.242
	518.509
	454.529
	1377.84
	488.2
	570.433
	469.043
	490.622
	913.749
	580.567
	737.83
	730.773
	456.894
	317.493
	788.012
	454.823
	473.704
	443.646
	286.456
	426.959
	959.755
	687.639
	562.576
	896.033
	351.736
	778.542
	698.246
	260.955
	608.999
	840.98
	614.64
	890.789
	604.804
	400.451
	653.357
	558.735
	1057.08
	932.712
	931.887
	620.54
	587.282
	812.525
	1240.31
	687.851
	516.614
	851.822
	975.483
	708.283
	975.246
	417.022
	675.596
	966.646
	767.483
	720.173
	885.064
	608.885
	867.734
	878.669
	550.691
	964.593
	874.404
	650.337
	792.67
	501.488
	567.225
	612.678
	480.468
	579.623
	629.439
	737.243
	1025.33
	492.391
	766.271
	785.493
	463.112
	692.573
	764.683
	644.347
	913.537
	840.484
	824.777
	605.893
	892.174
	976.527
	986.295
	609.867
	568.947
	530.857
	822.206
	851
	625.851
	1154.98
	817.447
	909.613
	1221.81
	518.777
	669.401
	428.174
	1072.35
	337.395
	525.729
	723.705
	836.659
	776.959
	968.07

## Sheet: 2E
d14	d28	ctrl			d14	d28	ctrl
0.46	0.514	0.68		Mean	0.4812	0.5166	0.519
0.55	0.608	0.44		SD	0.0813	0.07953	0.08141
0.45	0.474	0.48
0.55	0.506	0.58
0.41	0.595	0.53		1-way ANOVA
0.45	0.405	0.59		Tukey's Multiple Comparison Test	Mean Diff.	q	Significant? P < 0.05?	Summary	95% CI of diff
0.39	0.617	0.5		d14 vs d28	-0.03542	6.351	Yes	***	-0.05405 to -0.01679
0.49	0.382	0.47		d14 vs ctrl	-0.03779	6.547	Yes	***	-0.05707 to -0.01851
0.47	0.58	0.59		d28 vs ctrl	-0.002375	0.6668	No	ns	-0.01427 to 0.009522
0.62	0.632	0.6
0.51	0.46	0.48
0.55	0.412	0.49
0.44	0.509	0.54
0.42	0.494	0.67
0.54	0.603	0.49
0.39	0.592	0.63
0.56	0.51	0.52
0.43	0.51	0.43
0.49	0.584	0.45
0.61	0.552	0.64
0.43	0.521	0.48
0.49	0.604	0.47
0.39	0.414	0.43
0.36	0.524	0.42
0.4	0.687	0.52
0.49	0.51	0.47
0.43	0.538	0.76
0.57	0.514	0.56
0.47	0.708	0.47
0.5	0.492	0.54
0.4	0.528	0.45
0.39	0.625	0.53
0.4	0.481	0.4
0.41	0.486	0.47
0.37	0.536	0.59
0.42	0.658	0.42
0.48	0.472	0.52
0.58	0.594	0.47
0.41	0.587	0.57
0.59	0.59	0.48
0.55	0.406	0.42
0.44	0.468	0.47
0.43	0.513	0.42
0.45	0.52	0.45
0.43	0.509	0.57
0.49	0.502	0.49
0.55	0.416	0.47
0.6	0.446	0.43
0.53	0.454	0.6
0.51	0.441	0.51
0.53	0.458	0.48
0.57	0.426	0.55
0.47	0.425	0.46
0.42	0.477	0.47
0.41	0.387	0.54
0.35	0.489	0.47
0.5	0.596	0.49
0.57	0.517	0.53
0.51	0.499	0.51
0.62	0.501	0.54
0.59	0.562	0.57
0.55	0.456	0.69
0.69	0.528	0.54
0.41	0.589	0.47
0.48	0.464	0.72
0.58	0.442	0.58
0.36	0.487	0.65
0.46	0.476	0.41
0.56	0.434	0.48
0.46	0.385	0.51
0.5	0.39	0.59
0.4	0.452	0.46
0.65	0.64	0.58
0.46	0.441	0.51
0.41	0.408	0.55
0.45	0.531	0.52
0.44	0.651	0.54
0.49	0.581	0.49
0.69	0.465	0.51
0.58	0.34	0.59
0.46	0.462	0.76
0.41	0.562	0.41
0.41	0.385	0.44
0.42	0.536	0.66
0.49	0.464	0.47
0.35	0.593	0.4
0.52	0.502	0.54
0.44	0.546	0.51
0.39	0.485	0.48
0.51	0.489	0.42
0.37	0.48	0.63
0.36	0.547	0.59
0.44	0.518	0.48
0.42	0.443	0.46
0.47	0.475	0.57
0.38	0.57	0.41
0.51	0.679	0.5
0.49	0.607	0.43
0.48	0.548	0.35
0.37	0.436	0.61
0.38	0.437	0.44
0.49	0.463	0.54
0.43	0.487	0.4
0.6	0.729	0.49
0.57	0.48	0.44
0.49	0.529	0.47
0.56	0.509	0.45
0.69	0.493	0.48
0.56	0.627	0.41
0.7	0.525	0.52
0.45	0.504	0.5
0.39	0.496	0.47
0.41	0.471	0.43
0.45	0.568	0.44
0.52	0.537	0.48
0.61	0.441	0.65
0.48	0.476	0.52
0.59	0.522	0.49
0.48	0.366	0.64
0.48	0.483	0.38
0.52	0.462	0.72
0.4	0.447	0.44
0.44	0.573	0.65
0.33	0.524	0.54
0.54	0.54	0.72
	0.558	0.48
	0.467	0.51
	0.463	0.54
	0.519	0.5
	0.525	0.46
	0.527	0.64
	0.469	0.57
	0.378	0.54
	0.399	0.44
	0.477	0.5
	0.466	0.45
	0.468	0.48
	0.509	0.49
	0.439	0.5
	0.475	0.45
	0.564	0.48
	0.513	0.44
	0.368	0.49
	0.485	0.42
	0.407	0.47
	0.606	0.55
	0.42	0.43
	0.599	0.46
	0.464	0.48
	0.5065	0.38
	0.6715	0.38
	0.6035	0.4
	0.5143	0.51
	0.4807	0.45
	0.4955	0.59
	0.4267	0.52
	0.4561	0.6
	0.4504	0.51
	0.5397	0.57
	0.6241	0.52
	0.6407	0.6
	0.5712	0.49
	0.4552	0.57
	0.5891	0.45
	0.4624	0.58
	0.5502	0.43
	0.6417	0.48
	0.5251	0.5
	0.4985	0.61
	0.4538	0.65
	0.3869	0.65
	0.3982	0.59
	0.5903	0.57
	0.4816	0.55
	0.6818	0.57
	0.581	0.37
	0.4684	0.43
	0.6567	0.46
	0.6333	0.46
	0.6503	0.52
	0.6463	0.37
	0.6644	0.59
	0.5105	0.53
	0.4701	0.59
	0.4599	0.45
	0.4826	0.51
	0.7394	0.52
	0.6603	0.48
	0.5485	0.61
	0.4798	0.48
	0.5852	0.52
	0.4617	0.42
	0.5315	0.4
	0.4338	0.45
	0.4744	0.47
	0.4428	0.46
	0.4489	0.48
	0.5162	0.42
	0.4548	0.44
	0.5745	0.59
	0.5896	0.4
	0.4292	0.5
	0.6178	0.55
	0.6367	0.7
	0.5399	0.58
	0.4961	0.47
	0.5768	0.47
	0.5355	0.4
	0.4905	0.45
	0.4978	0.57
	0.5646	0.57
	0.4774	0.55
	0.6258	0.59
	0.4989	0.44
	0.5548	0.44
	0.4311	0.49
	0.6026	0.5
	0.5875	0.64
	0.7024	0.54
	0.4292	0.55
	0.6344	0.68
	0.558	0.47
	0.5279	0.42
	0.4468	0.46
	0.5764	0.44
	0.5326	0.45
	0.5002	0.43
	0.5096	0.51
	0.39	0.61
	0.4611	0.46
	0.5492	0.48
	0.6571	0.47
	0.4864	0.64
	0.5372	0.69
	0.4929	0.65
	0.5014	0.47
	0.4281	0.65
	0.6138	0.58
	0.5106	0.56
	0.5812	0.53
	0.5478	0.51
	0.4428	0.49
	0.4075	0.49
	0.4821	0.49
	0.4372	0.52
	0.5382	0.49
	0.4863	0.56
	0.4068	0.67
	0.6226	0.64
	0.4187	0.55
	0.5027	0.68
	0.404	0.46
	0.5212	0.49
	0.4964	0.7
	0.5595	0.51
	0.4203	0.59
	0.3651	0.48
	0.5751	0.54
	0.5287	0.56
	0.4477	0.43
	0.5861	0.67
	0.4267	0.53
	0.3679	0.42
	0.52	0.64
	0.59	0.55
	0.6191	0.39
	0.5014	0.59
	0.5152	0.54
	0.4681	0.47
	0.5293	0.67
	0.6123	0.41
	0.6004	0.44
	0.5833	0.73
	0.5775	0.49
	0.5563	0.56
	0.5777	0.44
	0.4851	0.7
	0.6113	0.7
	0.4008	0.46
	0.5429	0.42
	0.5867	0.49
	0.4941	0.48
	0.4323	0.54
	0.6304	0.49
	0.6021	0.51
	0.5805	0.5
	0.4519	0.52
	0.3998	0.47
	0.5569	0.39
	0.524	0.61
	0.6323	0.51
	0.52	0.52
	0.5736	0.4
	0.5688	0.5
	0.4477	0.59
	0.4067	0.4
	0.7456	0.6
	0.6286	0.52
	0.4811	0.68
	0.6319	0.646
	0.5628	0.4434
	0.5555	0.4058
	0.5105	0.3858
	0.5473	0.5133
	0.5563	0.6504
	0.532	0.5003
	0.6564	0.4802
	0.4814	0.4539
	0.652	0.4578
	0.4977	0.4812
	0.5615	0.6781
	0.4325	0.4472
	0.6041	0.591
	0.5503	0.4384
	0.4336	0.4725
	0.5221	0.4942
	0.5076	0.4097
	0.5247	0.4577
	0.5343	0.5047
	0.625	0.504
	0.5576	0.5397
	0.5341	0.5683
	0.6851	0.4485
	0.5004	0.4721
	0.5881	0.487
	0.6468	0.5534
	0.5688	0.4569
	0.4951	0.4494
	0.5396	0.4993
	0.5834	0.5671
	0.4507	0.4708
	0.5679	0.5053
	0.6073	0.4779
	0.5838	0.5018
	0.6799	0.4757
	0.6525	0.453
	0.5846	0.507
	0.3875	0.5548
	0.5257	0.6101
	0.658	0.598
	0.5564	0.6403
	0.5277	0.4962
	0.6772	0.4724
	0.3808	0.5194
	0.5159	0.532
	0.6294	0.6412
	0.5014	0.6247
	0.618	0.5893
	0.5822	0.4568
	0.4713	0.5464
	0.5489	0.4929
	0.5797	0.4608
	0.4768	0.5363
	0.5641	0.4326
	0.629	0.6436
	0.4332	0.7485
	0.6646	0.488
	0.5102	0.6234
	0.5202	0.4373
	0.3688	0.4558
	0.5133	0.5358
	0.47	0.5053
	0.4607	0.4154
	0.4493	0.4406
	0.4278	0.4505
	0.4798	0.5511
	0.5712	0.5669
	0.4167	0.5368
	0.458	0.5201
	0.3792	0.6268
	0.4878	0.7503
	0.442	0.4906
	0.4315	0.5664
	0.5249	0.7395
	0.3979	0.5395
	0.5497	0.666
	0.5773	0.5807
	0.5245	0.5376
	0.51	0.6268
	0.4644	0.5249
	0.4788	0.4698
	0.4645	0.4762
	0.4377	0.5267
	0.4326	0.5902
	0.5553	0.5392
	0.4797	0.6134
	0.6597	0.4897
	0.5996	0.5314
	0.4523	0.5049
	0.438	0.5336
	0.459	0.7368
	0.5157	0.5225
	0.5717	0.6473
	0.6311	0.59
	0.4072	0.4378
	0.5431	0.4044
	0.5474	0.4632
	0.4762	0.451
	0.4645	0.4648
	0.6076	0.4659
	0.4459	0.5081
	0.7049	0.4246
	0.6974	0.5675
	0.5312	0.6712
	0.5145	0.5035
	0.6927	0.5561
	0.4955	0.5574
	0.6414	0.3883
	0.6903	0.4668
	0.757	0.5852
	0.5452	0.4169
	0.4229	0.546
	0.4928	0.6023
	0.587	0.4188
	0.7606	0.7471
	0.6397	0.4798
	0.7468	0.4632
	0.4403	0.5434
	0.512	0.4628
	0.4775	0.536
	0.4145	0.4858
	0.5175	0.6534
	0.6251	0.6148
	0.5418	0.4155
	0.5699	0.5264
	0.4805	0.4541
	0.4833	0.4269
	0.5163	0.5518
	0.4275	0.5939
	0.5051	0.5131
	0.4802	0.5425
	0.405	0.5488
	0.4449	0.5647
	0.5592	0.3955
	0.5243
	0.5244
	0.472
	0.7353
	0.4536
	0.5203
	0.6409
	0.4531
	0.4715
	0.473
	0.5112
	0.4388
	0.3787
	0.6027
	0.4675
	0.4712
	0.3912
	0.523
	0.4182
	0.3863
	0.486
	0.4527
	0.5504
	0.4667
	0.5277
	0.578
	0.4717
	0.5593
	0.572
	0.5062
	0.4965
	0.4394
	0.6647
	0.4567
	0.4085
	0.3602
	0.6227
	0.4132
	0.5436
	0.6312
	0.6671
	0.4005
	0.4212
	0.5799
	0.5523
	0.4914
	0.5087
	0.5319
	0.5534
	0.476
	0.5851
	0.6484
	0.4399
	0.5519
	0.4572
	0.4634
	0.5111
	0.4217
	0.5889
	0.4754
	0.4949
	0.5166
	0.453
	0.4713
	0.4785
	0.4692
	0.6833
	0.6102
	0.5649
	0.5264
	0.6555
	0.5176
	0.4172
	0.4629
	0.5248
	0.512
	0.5206
	0.4437
	0.4394
	0.5424
	0.6333
	0.6491
	0.5183
	0.5974
	0.474
	0.4998
	0.5646
	0.4582
	0.5341
	0.6601
	0.5178
	0.5247
	0.5594
	0.4113
	0.5112
	0.4817
	0.4854
	0.6184
	0.7458
	0.4246
	0.4558
	0.5515
	0.4652
	0.6257
	0.4736
	0.3924
	0.4426
	0.6417
	0.4584
	0.4951
	0.4418
	0.5915
	0.5312
	0.5421
	0.4826
	0.4072
	0.4501
	0.4392
	0.5197
	0.4826
	0.4439
	0.4266
	0.4513
	0.6191
	0.4509
	0.4763
	0.5303
	0.4409
	0.4619
	0.5109
	0.4383
	0.4506
	0.4672
	0.4413
	0.5661
	0.4988
	0.4064
	0.5947
	0.4338
	0.3753
	0.4985
	0.4053
	0.5562
	0.5257
	0.5307
	0.7184
	0.466
	0.5369
	0.5091
	0.4391
	0.532
	0.3933
	0.4778
	0.5693
	0.4581
	0.5324
	0.5412
	0.4512
	0.4237
	0.4205
	0.5583
	0.5246
	0.4207
	0.411
	0.5677
	0.4609
	0.5779
	0.3893
	0.5154
	0.5216
	0.3885
	0.4466
	0.4453
	0.424
	0.4933
	0.4413
	0.6396
	0.4332
	0.5842
	0.4953
	0.5352
	0.4695
	0.505
	0.3845

## Sheet: 2F
d14	d28	ctrl			d14	d28	ctrl
29.59	24.121	20.84		Mean	34.65	18.71	19.02
29.59	24.121	24.74		SD	14.67	5.225	4.369
30.95	21.311	25.42
21.72	13.614	20.68
21.72	13.614	17.58		1-way ANOVA
26.71	23.233	26.13		Tukey's Multiple Comparison Test	Mean Diff.	q	Significant? P < 0.05?	Summary	95% CI of diff
36.32	13.979	18.48		d14 vs d28	15.93	34.59	Yes	***	14.39 to 17.47
35.12	16.896	23.82		d14 vs ctrl	15.63	32.78	Yes	***	14.04 to 17.22
60.71	19.344	23.21		d28 vs ctrl	-0.3023	1.028	No	ns	-1.285 to 0.6804
36.21	12.999	16.36
44.75	15.338	16.36
36.12	15.338	18.45
36.12	12.777	22.51
64.78	9.773	20.78
46.45	9.773	17.25
27.43	26.553	17.25
34.92	21.466	35.43
56.25	19.503	17.58
18.51	15.782	20.84
19.16	16.951	19.32
23.03	14.856	19.32
18.51	17.513	16.99
67.15	21.042	16.99
74.94	15.244	21.93
48.65	23.002	15.34
48.65	13.934	15.34
40.23	15.029	19.41
40.23	16.159	21.64
51.04	23.98	15.2
30.6	24.161	15.2
27.84	17.341	17.58
33.34	14.038	20.78
27.84	16.419	17.58
44.21	15.041	22.98
45.48	22.855	22.98
61.43	14.859	30.81
34.4	13.878	18.47
42.07	15.142	18.47
57.82	15.142	20.46
52.38	15.041	27.46
19.34	17.436	22.28
19.34	19.608	18.48
56.07	17.341	30.71
44.24	10.271	14.51
21.8	10.271	13.85
21.8	21.457	13.85
23.03	22.855	24.92
23.03	10.628	16.55
24.97	10.628	17.61
28.69	28.84	17.37
8.27	18.029	17.85
8.27	16.121	18.84
27.1	11.564	18.84
25.1	11.564	17.37
25.1	15.149	18.29
59.63	13.52	15.55
33.62	10.374	15.55
44.41	10.374	16.69
18.7	10.878	20.31
18.61	18.217	16.69
11.14	13.934	24.54
9.45	14.387	14.66
9.45	16.067	16.94
20.83	14.859	19.19
20.83	15.415	23.09
47.47	15.415	25.34
68.32	13.52	17.27
47.47	16.896	22.84
51.92	13.979	19.59
22.79	19.919	19.99
22.79	21.465	17.41
49.42	12.421	17.24
41.17	12.421	20.34
37.33	19.553	19.34
37.33	11.786	17.16
42.74	11.786	23.09
18.15	13.936	23.09
18.15	13.936	13.25
21.99	16.774	13.25
21.99	16.774	21.2
56.71	20.712	26.26
26.67	14.859	19.53
26.67	15.521	19.53
48.49	11.397	18.86
24.51	11.397	22.6
24.51	18.319	22.6
53.52	18.319	22.28
20.14	14.038	23.24
24.09	13.794	22.74
20.14	17.503	22.74
34.23	13.794	19.15
46.94	19.455	19.02
32.08	13.754	21.71
32.08	13.754	18.86
22.64	15.335	22.86
22.64	15.335	21.71
41.42	30.44	32.29
53.89	22.006	29.02
24.51	11.82	30.17
24.51	11.82	25.01
36.26	13.779	24.07
29.23	13.779	20.86
29.23	15.447	15.54
42.69	15.447	19.15
37.31	12.531	15.08
43.15	12.531	12.98
35.3	19.778	12.98
37.31	15.782	17.99
36.26	17.943	11.57
60.68	20.723	11.57
24.4	18.214	13.92
24.4	18.214	16.68
35.3	15.855	16.94
21.65	17.341	18.05
21.65	13.312	17.41
24.16	13.312	14.7
24.16	10.068	14.7
48.77	10.068	17.16
72.31	17.098	22.75
62.74	14.191	19.72
44.88	14.191	19.99
44.88	18.674	16.77
34.37	11.035	14.79
22.17	10.258	14.79
22.17	13.057	14.1
	10.258	16.36
	20.549	17.27
	19.977	15.94
	14.859	14.1
	16.924	20.78
	16.924	15.31
	15.442	16.15
	15.442	15.31
	17.35	15.41
	17.35	20.72
	15.435	15.41
	13.885	21.23
	13.885	17.24
	12.999	18.48
	16.121	20.8
	13.772	18.35
	11.677	20.25
	17.9	18.35
	11.677	21.55
	32.66	14.66
	23.477	21
	17.376	13.92
	10.335	24.54
	10.335	25.28
	13.7351	17.14
	28.073	17.14
	15.6487	31.95
	22.6794	23.45
	15.1599	15.81
	15.1599	15.81
	16.196	18.26
	11.7301	35.84
	11.7301	20.27
	15.2123	13.59
	21.7364	20.21
	14.989	13.59
	19.8442	22.15
	19.8442	24.32
	18.2854	24.57
	17.8066	17.81
	43.9755	21.24
	16.4496	21.24
	33.6484	39.85
	36.2636	24.83
	28.0858	17.82
	21.7453	21.47
	19.9988	22.84
	27.0282	17.81
	22.629	22.84
	22.629	20.21
	15.0505	17.82
	14.9487	21.47
	15.2318	16.43
	15.2318	21.77
	11.9455	17.18
	19.6088	22.67
	27.1162	16.43
	19.2983	19.78
	19.6051	19.15
	21.7364	22.12
	21.9705	19.99
	36.1677	19.99
	21.4357	16.13
	20.5222	21.57
	26.6037	17.18
	33.1822	10.74
	22.2821	19.15
	28.005	10.74
	10.2048	24.45
	13.9251	16.13
	16.0666	16.02
	15.6487	11.99
	18.5594	20.5
	18.5594	20.5
	19.1582	15.05
	16.4871	11.48
	16.4871	16.01
	16.3547	16.01
	16.1112	16.66
	16.1112	20.56
	16.6835	11.48
	16.6835	16.16
	16.4496	16.16
	10.654	22.35
	10.654	18.73
	14.989	16.02
	18.0891	20.56
	19.3577	17.58
	20.6061	18.73
	19.9988	11.12
	26.0433	11.12
	17.0329	27.62
	17.0329	14.5
	15.0505	14.5
	20.0759	21.83
	17.0122	16.13
	13.5873	15.28
	14.9487	15.28
	13.5873	18.77
	18.3444	19.39
	18.3444	17.38
	11.9455	16.13
	20.406	21.62
	15.4643	21.62
	24.9854	18.58
	18.448	18.62
	21.5882	14.92
	25.2795	14.92
	24.1708	20.05
	22.3866	11.64
	14.8553	23.51
	14.5374	25.42
	14.5374	20.17
	14.7572	11.64
	19.2983	18.23
	15.4643	18.07
	20.3161	18.07
	20.3161	13.2
	41.9188	13.2
	11.5071	17.54
	17.0366	17.01
	11.5071	20.64
	21.9705	18.89
	26.1214	23.8
	24.0298	17.01
	22.3777	19.17
	20.6541	19.64
	12.2341	16.46
	10.2048	16.46
	13.2547	16.94
	20.3963	16.94
	34.9086	18.89
	20.932	13.9
	13.7351	13.9
	25.8292	20.8
	13.2547	15.45
	18.1319	15.45
	15.8433	30.18
	17.4812	14
	13.3758	14
	13.3758	19.66
	14.9243	25.58
	36.583	21.29
	32.8589	16.08
	23.4518	16.2
	13.2697	16.08
	14.7365	16.2
	13.2697	20.35
	20.3871	8.37
	17.6972	8.37
	18.6711	32.49
	15.5375	19.13
	12.7301	19.13
	12.7301	30.75
	38.1681	23.8
	15.7386	23.19
	15.7386	26.59
	18.5996	21.44
	25.5044	19.54
	17.9741	20.58
	25.4847	19.54
	18.1076	24.24
	18.2726	21.79
	17.0981	18.31
	18.9322	18.31
	16.8955	23.19
	14.3435	17.85
	14.3435	17.85
	16.6909	16.27
	16.6909	18.78
	18.0175	16.27
	26.5861	15.74
	14.7913	12.1
	14.7913	12.1
	14.7035	15.13
	12.8652	15.13
	12.8652	20.91
	25.4896	14.56
	25.4896	14.56
	20.2703	17.57
	15.029	22.02
	15.029	17.81
	22.4729	17.49
	21.8782	17.49
	15.9799	16.83
	15.9799	15.8
	20.1235	15.8
	16.5996	15.99
	22.37	26.14
	26.2438	26.43
	26.2438	21.39
	29.4821	17.81
	21.1994	18.31
	21.1994	16.83
	14.8454	15.22
	18.0437	14.5
	16.1809	14.7
	21.0269	14.7
	17.1504	19.18
	17.1504	19.72
	17.8004	19.18
	20.9702	19.87
	20.1553	22.87
	18.6843	22.87
	13.2743	23.69
	13.2743	14.82
	22.1489	11.57
	22.1772	17.25
	22.1772	11.57
	11.1262	16.9
	26.6592	14.77
	16.1895	14.77
	24.8432	14.5
	11.5778	18.13
	18.108	21.1
	18.108	18.08
	16.4643	19.43
	16.4643	18.08
	17.0829	22.61
	21.6438	18.13
	21.6438	11.94
	17.5916	11.26
	17.5916	11.26
	16.1895	23.44
	18.4626	11.62
	19.2656	11.62
	13.8165	21.75
	13.8165	21.75
	10.6519	16.03
	10.6519	16.03
	26.7599	18.76
	11.1262	16.32
	16.5974	18.76
	16.5974	21.53
	24.7784	15.09
	32.8019	15.09
	25.6234	16.06
	16.6516	22.82
	23.5557	23.67
	16.6516	13.44
	27.2963	13.44
	19.6234	15.25
	19.6234	15.25
	17.9774	23.11
	17.9774	16.45
	15.2926	16.45
	24.348	18.41
	21.0385	26.44
	15.2955	19.9
	17.0061	22.23
	11.8698	20.4
	11.8698	22.16
	23.8738	15.69
	14.3137	15.69
	14.3137	20.41
	16.9693	22.23
	14.9142	24.99
	14.9142	19.9
	20.7778	20.46
	21.4415	20.46
	15.2926	16.5
	21.8997	16.5
	15.1877	26.63
	11.5778	17.06
	15.1877	19.92
	14.3838	22.35
	14.3838	19.92
	14.8454	20.14
	27.026	34.62
	27.026	17.06
	21.998	24.95
	19.3464	18.85
	19.3464	18.85
	21.998	18.02
	27.8997	15.59
	29.3919	21.82
	17.2597	15.59
	17.2597	23.65
	23.1915	23.77
	23.1915	23.77
	25.2921	21.27
	23.5954	20.14
	23.871	18.61
	21.8415	18.61
	23.1945	20.01
	21.4718	22.55
	21.4718	17.81
	31.5596	19.28
	22.642	17.81
	21.9082	25.59
	23.1802	22.11
	27.876	24.08
	13.5806	20.09
	13.5806	17
	27.5584	17
	25.9508	17.52
	25.9508	17.52
	14.972	25.21
	14.972	25.21
	11.7956	20.81
	11.7956	25.59
	20.8557	20.81
	17.4406	12.87
	25.2921	12.87
	15.8545	21.12
	15.8545	22.93
	14.8154	15.49
	14.8154	22.11
	17.7088	27.25
	22.644
	22.644
	29.8514
	25.9403
	14.4328
	14.4328
	15.4419
	27.0338
	25.2828
	20.3488
	20.3488
	25.5762
	22.9853
	13.8548
	13.8548
	16.5022
	17.4741
	16.7858
	16.7858
	19.1473
	15.4419
	16.9001
	22.9853
	23.0667
	25.4191
	23.0667
	24.0556
	14.7493
	18.7425
	18.7425
	20.438
	26.0685
	14.7493
	18.9015
	34.5381
	17.1293
	27.4058
	17.1293
	23.5128
	17.3932
	17.3932
	17.1773
	17.1773
	20.6652
	21.8898
	28.1091
	19.062
	18.5356
	18.5356
	17.0697
	17.0697
	24.705
	19.8217
	19.145
	19.9087
	19.145
	21.4878
	29.1078
	21.9154
	23.8156
	14.9097
	14.9097
	20.0619
	21.9154
	20.0619
	21.0026
	18.9455
	12.6577
	12.6577
	16.916
	16.916
	22.4116
	18.5398
	21.2125
	21.2125
	24.7997
	31.6601
	19.2656
	19.2656
	15.9701
	20.1975
	15.3962
	15.3962
	22.0858
	22.0858
	20.1975
	19.213
	19.213
	19.5354
	26.1553
	16.099
	16.099
	20.6822
	15.9376
	23.3284
	21.6248
	15.4288
	15.0573
	15.0573
	20.8779
	20.0308
	20.0308
	17.1176
	18.8003
	17.1176
	19.1547
	11.4397
	26.4845
	27.4066
	11.4397
	23.7913
	20.7033
	27.4003
	25.8824
	20.6123
	24.1699
	24.7406
	17.7723
	17.7723
	23.1321
	31.2301
	27.1294
	19.8089
	19.8089
	16.9468
	16.9468
	19.6983
	26.6785
	30.7926
	23.1306
	22.513
	22.513
	24.0331
	20.9572
	18.8443
	16.856
	16.856
	20.6123
	15.8396
	22.3625
	15.8396
	20.6851
	20.6563
	20.6851
	21.2783
	22.0319
	22.0319
	18.8443
	27.6288
	24.6796
	17.3465
	20.9472
	17.3465
	15.2944
	15.2944
	14.32
	14.32
	29.3032
	21.4411
	21.2197
	17.2913
	17.2913
	21.2197
	21.7682
	24.4026
	26.6145
	20.4444
	16.5492
	16.2132
	30.4137
	16.2132
	17.079
	11.9534
	11.9534
	17.079
	21.8624
	23.8226
	14.9878
	14.9878
	22.6987
	17.9423
	16.5492
	20.9914
	19.479

## Sheet: 2G
d14	d28	ctrl			d14	d28	ctrl
1	5	2		25% Percentile	1	4	3
0	6	6		Median	2	4	4
2	5	4		75% Percentile	3	5	5
3	5	5
4	5	5		Mean	2.456	4.38	4.187
3	6	4		SD	1.445	1.199	1.167
3	5	5
6	3	6		Kruskal-Wallis test
3	4	4		Dunn's Multiple Comparison Test	Difference in rank sum	Significant? P < 0.05?	Summary
0	3	4		d14 vs d28	-410	Yes	***
1	3	3		d14 vs ctrl	-369.5	Yes	***
1	6	4		d28 vs ctrl	40.47	No	ns
1	6	5
2	5	5
1	3	4
1	2	3
1	4	3
0	2	4
3	4	5
1	4	2
2	3	3
2	4	6
2	3	6
3	2	5
1	2	4
2	4	5
1	4	5
0	4	2
1	2	3
3	4	5
2	4	5
5	3	4
0	4	6
1	3	7
1	5	5
1	4	3
2	4	5
5	3	5
3	6	5
1	5	4
4	7	4
4	5	5
1	6	3
2	5	3
2	6	3
3	5	4
3	5	4
1	4	4
3	3	4
1	4	5
1	3	3
2	6	2
2	3	3
1	7	6
4	8	3
1	3	3
2	3	6
1	5	5
2	3	2
1	3	3
3	4	2
2	4	3
2	4	4
2	4	4
2	5	2
3	5	2
4	5	2
2	2	3
3	4	4
5	4	4
4	6	4
5	4	4
1	3	4
6	6	3
4	6	5
4	6	4
3	4	4
3	4	4
2	7	4
3	6	6
3	5	3
4	5	5
2	6	5
2	5	6
4	5	4
3	5	7
1	5	5
6	4	5
4	5	3
3	4	5
3	4	3
4	5	5
3	5	5
4	5	4
4	5	4
5	2	5
2	5	3
1	2	6
2	3	5
2	5	4
2	3	4
4	5	4
2	4	4
2	2	3
2	3	5
3	3	4
2	6	3
1	5	5
2	5	5
3	3	3
4	5	5
6	5	3
5	6	4
2	4	4
1	3	4
1	7	2
1	7	4
1	5	4
2	4	3
3	4	6
3	4	2
2	4	7
2	4	4
7	5	3
3	4	2
	4	5
	5	4
	5	5
	5	6
	5	4
	6	4
	5	4
	5	4
	6	4
	6	4
	5	6
	4	4
	3	6
	5	3
	4	5
	5	6
	4	6
	8	4
	3	5
	5	3
	3	3
	5	5
	2	5
	3	5
	7	4
	4	5
	3	5
	5	5
	5	4
	5	3
	5	5
	6	1
	4	4
	4	4
	4	4
	4	4
	5	3
	4	4
	4	2
	3	5
	3	4
	4	4
	5	4
	3	4
	5	4
	4	6
	4	3
	4	3
	4	6
	3	4
	4	5
	4	5
	4	3
	3	2
	4	4
	3	5
	3	5
	4	4
	6	2
	6	5
	6	3
	5	4
	3	5
	2	3
	5	3
	4	4
	6	6
	7	5
	5	5
	6	6
	4	4
	6	4
	2	6
	4	3
	3	1
	3	4
	5	1
	3	4
	4	3
	4	4
	3	6
	3	5
	3	6
	4	6
	5	6
	5	4
	5	5
	3	5
	4	5
	4	7
	4	6
	4	4
	5	4
	5	3
	6	5
	2	5
	4	5
	4	3
	4	6
	3	7
	4	5
	3	5
	3	2
	4	4
	5	4
	4	4
	5	6
	6	5
	4	3
	4	4
	5	5
	5	4
	6	4
	5	5
	4	3
	2	4
	5	6
	5	6
	3	4
	5	5
	4	3
	4	5
	6	5
	4	4
	6	3
	4	4
	6	5
	5	6
	4	3
	5	5
	6	6
	4	3
	4	5
	5	5
	5	4
	5	5
	7	6
	8	6
	5	2
	3	2
	4	5
	5	4
	5	4
	5	4
	6	5
	6	2
	3	5
	3	3
	4	5
	3	4
	5	4
	5	2
	4	4
	5	5
	5	5
	6	4
	4	2
	5	3
	4	6
	4	5
	5	5
	4	6
	6	4
	4	5
	3	5
	5	4
	4	4
	3	4
	5	4
	5	4
	8	5
	3	3
	3	4
	4	3
	3	4
	3	7
	2	6
	2	6
	3	4
	5	4
	5	3
	4	5
	4	5
	5	2
	5	6
	3	4
	5	3
	3	4
	3	4
	4	5
	4	3
	5	5
	7	5
	4	5
	5	5
	4	6
	3	2
	3	3
	4	5
	3	5
	3	3
	5	5
	3	3
	4	5
	5	4
	4	4
	4	4
	4	4
	6	7
	4	6
	3	6
	3	4
	7	4
	5	3
	4	3
	4	1
	4	2
	2	2
	5	5
	3	3
	3	2
	5	2
	3	3
	5	4
	7	3
	5	3
	3	4
	5	3
	5	4
	5	3
	3	4
	3	4
	4	3
	3	2
	6	5
	4	4
	3	4
	5	6
	6	4
	5	4
	4	5
	3	5
	4	5
	5	4
	5	3
	3	3
	5	2
	4	3
	4	3
	7	4
	5	4
	3	3
	4	5
	4	4
	5	5
	5	4
	4	3
	5	4
	5	5
	2	4
	5	4
	5	4
	3	5
	5	2
	6	5
	6	5
	6	3
	5	3
	3	4
	6	4
	4	3
	4	4
	6	4
	5	6
	4	3
	4	5
	5	4
	5	4
	3	4
	5	4
	4	4
	5	4
	3	6
	2	5
	3	5
	5	4
	5	4
	4	3
	4	5
	5	5
	2	3
	3	5
	3	5
	5	4
	3	5
	5	4
	6	4
	1	4
	2	5
	4	5
	6	5
	4	5
	4	6
	5	6
	7	4
	5	4
	5	5
	5	4
	3	3
	5
	6
	3
	3
	4
	5
	3
	6
	4
	4
	4
	4
	5
	4
	3
	5
	4
	3
	4
	5
	5
	7
	5
	4
	3
	4
	4
	5
	4
	4
	3
	5
	3
	7
	5
	5
	5
	5
	4
	3
	3
	5
	3
	4
	5
	6
	6
	4
	3
	8
	3
	3
	4
	4
	5
	4
	5
	5
	3
	3
	3
	3
	5
	7
	4
	5
	2
	4
	3
	5
	4
	3
	6
	8
	6
	7
	4
	7
	6
	5
	5
	4
	5
	3
	4
	3
	3
	5
	5
	4
	6
	5
	4
	6
	4
	4
	4
	4
	3
	6
	5
	4
	4
	4
	4
	2
	7
	7
	4
	3
	4
	6
	4
	3
	4
	6
	5
	6
	5
	4
	4
	5
	6
	4
	4
	6
	3
	6
	4
	5
	4
	3
	5
	7
	4
	3
	6
	4
	6
	7
	4
	4
	5
	4
	5
	5
	4
	5
	5
	7
	3
	4
	5
	4
	4
	5
	5
	3
	5
	5
	4
	3
	5
	5
	4
	4
	4
	5
	5
	5
	5
	4
	4
	5
	3
	4
	2
	5
	3
	4
	4
	5
	3
	4

## Sheet: 3B
d14	d28	ctrl			d14	d28	ctrl
26	164	173		Mean	27.17	146.6	172.7
16	147	174		SD	5.947	16.59	1.528
32	158	171
32	121
28	143			1-way ANOVA
29				Tukey's Multiple Comparison Test	Mean Diff.	q	Significant? P < 0.05?	Summary	95% CI of diff
				d14 vs d28	-119.4	25.83	Yes	***	-137.1 to -101.8
				d14 vs ctrl	-145.5	26.95	Yes	***	-166.1 to -124.9
				d28 vs ctrl	-26.07	4.674	Yes	*	-47.37 to -4.765

## Sheet: 3C
d14	d28	ctrl			d14	d28	ctrl
38	604	727		Mean	39	667.2	730.7
16	663	691		SD	11.78	54.92	41.62
44	695	774
42	630
46	744			1-way ANOVA
48				Tukey's Multiple Comparison Test	Mean Diff.	q	Significant? P < 0.05?	Summary	95% CI of diff
				d14 vs d28	-628.2	38.2	Yes	***	-691.0 to -565.4
				d14 vs ctrl	-691.7	36.02	Yes	***	-765.0 to -618.3
				d28 vs ctrl	-63.47	3.2	No	ns	-139.2 to 12.30

## Sheet: 3D
d14	d28	ctrl			d14	d28	ctrl
2.92308	7.36585	8.40462		Mean	2.816	9.201	8.467
2	9.02041	7.94253		SD	0.4864	1.273	0.5576
2.75	8.79747	9.05263
2.625	10.4132
3.28571	10.4056			1-way ANOVA
3.31034				Tukey's Multiple Comparison Test	Mean Diff.	q	Significant? P < 0.05?	Summary	95% CI of diff
				d14 vs d28	-6.385	17.18	Yes	***	-7.805 to -4.965
				d14 vs ctrl	-5.651	13.02	Yes	***	-7.309 to -3.993
				d28 vs ctrl	0.7339	1.637	No	ns	-0.9785 to 2.446

## Sheet: 3E
d14	d28	ctrl			d14	d28	ctrl
0.351282	0.606133	0.560657		Mean	0.3474	0.6148	0.5784
0.104167	0.62239	0.583178		SD	0.1706	0.00923	0.01585
0.20625	0.617232	0.591241
0.364583	0.624276
0.534524	0.604201			1-way ANOVA
0.523645				Tukey's Multiple Comparison Test	Mean Diff.	q	Significant? P < 0.05?	Summary	95% CI of diff
				d14 vs d28	-0.2674	5.416	Yes	**	-0.4561 to -0.07880
				d14 vs ctrl	-0.231	4.005	Yes	*	-0.4512 to -0.01067
				d28 vs ctrl	0.03649	0.6126	No	ns	-0.1910 to 0.2640

[truncated: 31 more sheets: 3F, 3G, 4B, 4C, 4D, 4E, 4F, 4G, 4H, 5B, 5C, 5D, 5E, 5F, 5G, 6B, 6C, 6D, 7A, 7B …]
